# Supplementary material
Source: PubMed Central journal article supplement (PMC1380192)
Supplement: jamia_M1749_1.pdf [file jamia_M1749_1.pdf]

Table 3: Systematic review of 4-years of quasi-designs in JAMIA

| <b>Study</b>          | <b>Journal</b> | <b>Informatics topic category</b> | <b>Quasi-experimental design</b> | <b>Limitation of quasi design mentioned in manuscript</b> |
|-----------------------|----------------|-----------------------------------|----------------------------------|-----------------------------------------------------------|
| Staggers et al.[20]   | JAMIA          | 1                                 | Counterbalanced study design     | Yes                                                       |
| Schriger et al.[21]   | JAMIA          | 1                                 | A5                               | Yes                                                       |
| Patel et al.[22]      | JAMIA          | 2                                 | A5 (Study 1, phase 1)            | No                                                        |
| Patel et al.[22]      | JAMIA          | 2                                 | A2 (Study 1, phase 2)            | No                                                        |
| Borowitz et al.[23]   | JAMIA          | 1                                 | A2                               | No                                                        |
| Patterson et al.[24]  | JAMIA          | 6                                 | C1                               | Yes                                                       |
| Rocha et al.[25]      | JAMIA          | 5                                 | A2                               | Yes                                                       |
| Lovis et al.[26]      | JAMIA          | 1                                 | Counterbalanced study design     | No                                                        |
| Hersh et al.[27]      | JAMIA          | 6                                 | B1                               | No                                                        |
| Makoul et al[28].     | JAMIA          | 2                                 | B1                               | Yes                                                       |
| Ruland et al.[29]     | JAMIA          | 3                                 | B1                               | No                                                        |
| DeLusignan et al.[30] | JAMIA          | 1                                 | A1                               | No                                                        |
| Mekhjjan et al.[31]   | JAMIA          | 1                                 | A2 (study design 1)              | Yes                                                       |
| Mekhjjan et al.[31]   | JAMIA          | 1                                 | B1 (study design 2)              | Yes                                                       |
| Ammenwerth et al.[32] | JAMIA          | 1                                 | A2                               | No                                                        |
| Oniki et al.[33]      | JAMIA          | 5                                 | C1                               | Yes                                                       |

|                              |       |   |                                 |     |
|------------------------------|-------|---|---------------------------------|-----|
| Liederman et al.[34]         | JAMIA | 1 | A1 (study 1)                    | No  |
| Liederman et al.[34]         | JAMIA | 1 | A2* (study 2)                   | No  |
| Rotich et al.[35]            | JAMIA | 2 | A2*                             | No  |
| Payne et al.[36]             | JAMIA | 1 | A1                              | No  |
| Hoch et al.[37]              | JAMIA | 3 | A2*                             | No  |
| Laerum et al.[38]            | JAMIA | 1 | B1                              | Yes |
| Devine et al.[39]            | JAMIA | 1 | Counterbalanced<br>study design |     |
| Dunbar et al.[40]            | JAMIA | 6 | A1                              |     |
| Lenert et al.[41]            | JAMIA | 6 | A2                              |     |
| Koide et al.[42]             | IJMI  | 5 | D4                              | No  |
| Gonzalez-Hendrich et al.[43] | IJMI  | 2 | A1                              | No  |
| Anantharaman et al.[44]      | IJMI  | 3 | B1                              | No  |
| Chae et al.[45]              | IJMI  | 6 | A2                              | No  |
| Lin et al.[46]               | IJMI  | 3 | A1                              | No  |
| Mikulich et al.[47]          | IJMI  | 1 | A2                              | Yes |
| Hwang et al.[48]             | IJMI  | 1 | A2                              | Yes |
| Park et al.[49]              | IJMI  | 1 | C2                              | No  |
| Park et al.[49]              | IJMI  | 1 | D4                              | No  |

---

\* could have been analyzed as an interrupted-time series design
